# Supplementary material
Source: publisher site journal article supplement (https://www.dovepress.com/article/566637)
Supplement: Supplementary file 1 [file 566637%20Revised%20SupplementaryMaterial.docx]

**Supplementary Table 1** Genomic Information of 84 Complete P. aeruginosa Genomes Associated with HAP.

| Genome ID | Genome Name | Strain | Completion Dat | Assembly Accession | Host Health |
| --- | --- | --- | --- | --- | --- |
| 287.11091 | Pseudomonas aeruginosa strain GIMC5019:PA52Ts1 | GIMC5019:PA52Ts1 | 2020-05-18T00:00:00Z | GCA_013114915.1 | nosocomial pneumonia |
| 287.11092 | Pseudomonas aeruginosa strain GIMC5020:PA52Ts2 | GIMC5020:PA52Ts2 | 2020-05-18T00:00:00Z | GCA_013114935.1 | nosocomial pneumonia |
| 287.11094 | Pseudomonas aeruginosa strain GIMC5021:PA52Ts17 | GIMC5021:PA52Ts17 | 2020-05-18T00:00:00Z | GCA_013114955.1 | nosocomial pneumonia |
| 287.11595 | Pseudomonas aeruginosa strain PABCH09 | PABCH09 | 2020-06-29T00:00:00Z | GCA_013375775.1 | Ventilator-associated pneumonia |
| 287.11596 | Pseudomonas aeruginosa strain PABCH13 | PABCH13 | 2020-06-29T00:00:00Z | GCA_013375795.1 | Ventilator-associated pneumonia |
| 287.11597 | Pseudomonas aeruginosa strain PABCH10 | PABCH10 | 2020-06-29T00:00:00Z | GCA_013375815.1 | Ventilator-associated pneumonia |
| 287.11598 | Pseudomonas aeruginosa strain PABCH01 | PABCH01 | 2020-06-29T00:00:00Z | GCA_013375915.1 | Ventilator-associated pneumonia |
| 287.11599 | Pseudomonas aeruginosa strain PABCH45 | PABCH45 | 2020-06-29T00:00:00Z | GCA_013375835.1 | Ventilator-associated pneumonia |
| 287.116 | Pseudomonas aeruginosa strain PABCH14 | PABCH14 | 2020-06-29T00:00:00Z | GCA_013375855.1 | Ventilator-associated pneumonia |
| 287.11601 | Pseudomonas aeruginosa strain PABCH46 | PABCH46 | 2020-06-29T00:00:00Z | GCA_013375875.1 | Ventilator-associated pneumonia |
| 287.11602 | Pseudomonas aeruginosa strain PABCH42 | PABCH42 | 2020-06-29T00:00:00Z | GCA_013375895.1 | Ventilator-associated pneumonia |
| 287.11738 | Pseudomonas aeruginosa strain PABCH05 | PABCH05 | 2020-06-29T00:00:00Z | GCA_013375755.1 | Ventilator-associated pneumonia |
| 287.11985 | Pseudomonas aeruginosa strain PAL1.63 | PAL1.63 | 2020-07-29T00:00:00Z | GCA_013912425.1 | ventilator-associated pneumonia |
| 287.11986 | Pseudomonas aeruginosa strain PAL1.62 | PAL1.62 | 2020-07-29T00:00:00Z | GCA_013912465.1 | ventilator-associated pneumonia |
| 287.11987 | Pseudomonas aeruginosa strain PAL1.61 | PAL1.61 | 2020-07-29T00:00:00Z | GCA_013912485.1 | ventilator-associated pneumonia |
| 287.11989 | Pseudomonas aeruginosa strain PAL1.57 | PAL1.57 | 2020-07-29T00:00:00Z | GCA_013912505.1 | ventilator-associated pneumonia |
| 287.1199 | Pseudomonas aeruginosa strain PAL1.58 | PAL1.58 | 2020-07-29T00:00:00Z | GCA_013912515.1 | ventilator-associated pneumonia |
| 287.11991 | Pseudomonas aeruginosa strain PAL1.56 | PAL1.56 | 2020-07-29T00:00:00Z | GCA_013912565.1 | ventilator-associated pneumonia |
| 287.11992 | Pseudomonas aeruginosa strain PAL1.54 | PAL1.54 | 2020-07-29T00:00:00Z | GCA_013912575.1 | ventilator-associated pneumonia |
| 287.11993 | Pseudomonas aeruginosa strain PAL1.55 | PAL1.55 | 2020-07-29T00:00:00Z | GCA_013912585.1 | ventilator-associated pneumonia |
| 287.11994 | Pseudomonas aeruginosa strain PAL1.53 | PAL1.53 | 2020-07-29T00:00:00Z | GCA_013912615.1 | ventilator-associated pneumonia |
| 287.11995 | Pseudomonas aeruginosa strain PAL1.52 | PAL1.52 | 2020-07-29T00:00:00Z | GCA_013912625.1 | ventilator-associated pneumonia |
| 287.11997 | Pseudomonas aeruginosa strain PAL1.50 | PAL1.50 | 2020-07-29T00:00:00Z | GCA_013912685.1 | ventilator-associated pneumonia |
| 287.11999 | Pseudomonas aeruginosa strain PAL1.48 | PAL1.48 | 2020-07-29T00:00:00Z | GCA_013912715.1 | ventilator-associated pneumonia |
| 287.12 | Pseudomonas aeruginosa strain PAL1.49 | PAL1.49 | 2020-07-29T00:00:00Z | GCA_013912725.1 | ventilator-associated pneumonia |
| 287.12001 | Pseudomonas aeruginosa strain PAL1.46 | PAL1.46 | 2020-07-29T00:00:00Z | GCA_013912765.1 | ventilator-associated pneumonia |
| 287.12002 | Pseudomonas aeruginosa strain PAL1.45 | PAL1.45 | 2020-07-29T00:00:00Z | GCA_013912775.1 | ventilator-associated pneumonia |
| 287.12003 | Pseudomonas aeruginosa strain PAL1.44 | PAL1.44 | 2020-07-29T00:00:00Z | GCA_013912795.1 | ventilator-associated pneumonia |
| 287.12004 | Pseudomonas aeruginosa strain PAL1.43 | PAL1.43 | 2020-07-29T00:00:00Z | GCA_013912825.1 | ventilator-associated pneumonia |
| 287.12005 | Pseudomonas aeruginosa strain PAL1.41 | PAL1.41 | 2020-07-29T00:00:00Z | GCA_013912835.1 | ventilator-associated pneumonia |
| 287.12007 | Pseudomonas aeruginosa strain PAL1.39 | PAL1.39 | 2020-07-29T00:00:00Z | GCA_013912885.1 | ventilator-associated pneumonia |
| 287.12008 | Pseudomonas aeruginosa strain PAL1.38 | PAL1.38 | 2020-07-29T00:00:00Z | GCA_013912895.1 | ventilator-associated pneumonia |
| 287.12009 | Pseudomonas aeruginosa strain PAL1.37 | PAL1.37 | 2020-07-29T00:00:00Z | GCA_013912925.1 | ventilator-associated pneumonia |
| 287.12012 | Pseudomonas aeruginosa strain PAL1.32 | PAL1.32 | 2020-07-29T00:00:00Z | GCA_013912985.1 | ventilator-associated pneumonia |
| 287.12013 | Pseudomonas aeruginosa strain PAL1.31 | PAL1.31 | 2020-07-29T00:00:00Z | GCA_013912995.1 | ventilator-associated pneumonia |
| 287.12014 | Pseudomonas aeruginosa strain PAL1.28 | PAL1.28 | 2020-07-29T00:00:00Z | GCA_013913045.1 | ventilator-associated pneumonia |
| 287.12015 | Pseudomonas aeruginosa strain PAL1.30 | PAL1.30 | 2020-07-29T00:00:00Z | GCA_013913025.1 | ventilator-associated pneumonia |
| 287.12016 | Pseudomonas aeruginosa strain PAL1.27 | PAL1.27 | 2020-07-29T00:00:00Z | GCA_013913085.1 | ventilator-associated pneumonia |
| 287.12017 | Pseudomonas aeruginosa strain PAL1.29 | PAL1.29 | 2020-07-29T00:00:00Z | GCA_013913035.1 | ventilator-associated pneumonia |
| 287.12019 | Pseudomonas aeruginosa strain PAL1.22 | PAL1.22 | 2020-07-29T00:00:00Z | GCA_013913145.1 | ventilator-associated pneumonia |
| 287.1202 | Pseudomonas aeruginosa strain PAL1.25 | PAL1.25 | 2020-07-29T00:00:00Z | GCA_013913125.1 | ventilator-associated pneumonia |
| 287.12021 | Pseudomonas aeruginosa strain PAL1.23 | PAL1.23 | 2020-07-29T00:00:00Z | GCA_013913155.1 | ventilator-associated pneumonia |
| 287.12022 | Pseudomonas aeruginosa strain PAL1.21 | PAL1.21 | 2020-07-29T00:00:00Z | GCA_013913185.1 | ventilator-associated pneumonia |
| 287.12023 | Pseudomonas aeruginosa strain PAL1.19 | PAL1.19 | 2020-07-29T00:00:00Z | GCA_013913205.1 | ventilator-associated pneumonia |
| 287.12025 | Pseudomonas aeruginosa strain PAL1.15 | PAL1.15 | 2020-07-29T00:00:00Z | GCA_013913245.1 | ventilator-associated pneumonia |
| 287.12026 | Pseudomonas aeruginosa strain PAL1.18 | PAL1.18 | 2020-07-29T00:00:00Z | GCA_013913255.1 | ventilator-associated pneumonia |
| 287.12027 | Pseudomonas aeruginosa strain PAL1.13 | PAL1.13 | 2020-07-29T00:00:00Z | GCA_013913295.1 | ventilator-associated pneumonia |
| 287.12028 | Pseudomonas aeruginosa strain PAL1.14 | PAL1.14 | 2020-07-29T00:00:00Z | GCA_013913275.1 | ventilator-associated pneumonia |
| 287.12029 | Pseudomonas aeruginosa strain PAL1.12 | PAL1.12 | 2020-07-29T00:00:00Z | GCA_013913335.1 | ventilator-associated pneumonia |
| 287.1203 | Pseudomonas aeruginosa strain PAL1.11 | PAL1.11 | 2020-07-29T00:00:00Z | GCA_013913325.1 | ventilator-associated pneumonia |
| 287.12032 | Pseudomonas aeruginosa strain PAL1.10 | PAL1.10 | 2020-07-29T00:00:00Z | GCA_013913365.1 | ventilator-associated pneumonia |
| 287.12033 | Pseudomonas aeruginosa strain PAL1.9 | PAL1.9 | 2020-07-29T00:00:00Z | GCA_013913385.1 | ventilator-associated pneumonia |
| 287.12034 | Pseudomonas aeruginosa strain PAL1.7 | PAL1.7 | 2020-07-29T00:00:00Z | GCA_013913425.1 | ventilator-associated pneumonia |
| 287.12035 | Pseudomonas aeruginosa strain PAL1.6 | PAL1.6 | 2020-07-29T00:00:00Z | GCA_013913435.1 | ventilator-associated pneumonia |
| 287.12038 | Pseudomonas aeruginosa strain PAL1.2 | PAL1.2 | 2020-07-29T00:00:00Z | GCA_013913545.1 | ventilator-associated pneumonia |
| 287.12039 | Pseudomonas aeruginosa strain PAL1.3 | PAL1.3 | 2020-07-29T00:00:00Z | GCA_013913495.1 | ventilator-associated pneumonia |
| 287.1204 | Pseudomonas aeruginosa strain PAL1.59 | PAL1.59 | 2020-08-01T00:00:00Z | GCA_014040775.1 | ventilator-associated pneumonia |
| 287.12041 | Pseudomonas aeruginosa strain PAL1.24 | PAL1.24 | 2020-08-01T00:00:00Z | GCA_014040785.1 | ventilator-associated pneumonia |
| 287.12043 | Pseudomonas aeruginosa strain PAL1.34 | PAL1.34 | 2020-08-01T00:00:00Z | GCA_014040815.1 | ventilator-associated pneumonia |
| 287.12044 | Pseudomonas aeruginosa strain PAL1.67 | PAL1.67 | 2020-08-01T00:00:00Z | GCA_014040825.1 | ventilator-associated pneumonia |
| 287.12103 | Pseudomonas aeruginosa strain PAL1.60 | PAL1.60 | 2020-07-29T00:00:00Z | GCA_013912495.1 | ventilator-associated pneumonia |
| 287.12104 | Pseudomonas aeruginosa strain PAL1.47 | PAL1.47 | 2020-07-29T00:00:00Z | GCA_013912665.1 | ventilator-associated pneumonia |
| 287.12105 | Pseudomonas aeruginosa strain PAL1.51 | PAL1.51 | 2020-07-29T00:00:00Z | GCA_013912695.1 | ventilator-associated pneumonia |
| 287.12106 | Pseudomonas aeruginosa strain PAL1.40 | PAL1.40 | 2020-07-29T00:00:00Z | GCA_013912865.1 | ventilator-associated pneumonia |
| 287.12107 | Pseudomonas aeruginosa strain PAL1.36 | PAL1.36 | 2020-07-29T00:00:00Z | GCA_013912935.1 | ventilator-associated pneumonia |
| 287.12108 | Pseudomonas aeruginosa strain PAL1.35 | PAL1.35 | 2020-07-29T00:00:00Z | GCA_013912965.1 | ventilator-associated pneumonia |
| 287.12109 | Pseudomonas aeruginosa strain PAL1.26 | PAL1.26 | 2020-07-29T00:00:00Z | GCA_013913095.1 | ventilator-associated pneumonia |
| 287.1211 | Pseudomonas aeruginosa strain PAL1.8 | PAL1.8 | 2020-07-29T00:00:00Z | GCA_013913375.1 | ventilator-associated pneumonia |
| 287.12111 | Pseudomonas aeruginosa strain PAL1.20 | PAL1.20 | 2020-07-29T00:00:00Z | GCA_013913215.1 | ventilator-associated pneumonia |
| 287.12112 | Pseudomonas aeruginosa strain PAL1.5 | PAL1.5 | 2020-07-29T00:00:00Z | GCA_013913465.1 | ventilator-associated pneumonia |
| 287.12113 | Pseudomonas aeruginosa strain PAL1.4 | PAL1.4 | 2020-07-29T00:00:00Z | GCA_013913485.1 | ventilator-associated pneumonia |
| 287.12114 | Pseudomonas aeruginosa strain PAL1.33 | PAL1.33 | 2020-08-01T00:00:00Z | GCA_014040795.1 | ventilator-associated pneumonia |
| 287.12115 | Pseudomonas aeruginosa strain PAL1.16 | PAL1.16 | 2020-08-01T00:00:00Z | GCA_014040885.1 | ventilator-associated pneumonia |
| 287.2899 | Pseudomonas aeruginosa strain PA_D1 | PA_D1 | 2016-09-08T00:00:00Z | GCF_001721745.1 | Ventilator associated pneumonia |
| 287.29 | Pseudomonas aeruginosa strain PA_D2 | PA_D2 | 2016-09-08T00:00:00Z | GCF_001721765.1 | Ventilator associated pneumonia |
| 287.2901 | Pseudomonas aeruginosa strain PA_D9 | PA_D9 | 2016-09-08T00:00:00Z | GCF_001721785.1 | Ventilator associated pneumonia |
| 287.2902 | Pseudomonas aeruginosa strain PA_D16 | PA_D16 | 2016-09-08T00:00:00Z | GCF_001721805.1 | Ventilator associated pneumonia |
| 287.2903 | Pseudomonas aeruginosa strain PA_D22 | PA_D22 | 2016-09-08T00:00:00Z | GCF_001721825.1 | Ventilator associated pneumonia |
| 287.2906 | Pseudomonas aeruginosa strain PA_D5 | PA_D5 | 2016-09-08T00:00:00Z | GCF_001722025.1 | Ventilator associated pneumonia |
| 287.2907 | Pseudomonas aeruginosa strain PA_D21 | PA_D21 | 2016-09-08T00:00:00Z | GCF_001722045.1 | Ventilator associated pneumonia |
| 287.405 | Pseudomonas aeruginosa strain 124 | 24 | 2017-06-13T00:00:00Z | GCA_002192475.1 | ventilator-associated pneumonia |
| 287.4051 | Pseudomonas aeruginosa strain 58 | 58 | 2017-06-13T00:00:00Z | GCA_002192495.1 | ventilator-associated pneumonia |
| 287.409 | Pseudomonas aeruginosa strain 84 | 84 | 2017-06-22T00:00:00Z | GCA_002205335.1 | ventilator-associated pneumonia |
| 287.4091 | Pseudomonas aeruginosa strain 127 | 127 | 2017-06-22T00:00:00Z | GCA_002205355.1 | ventilator-associated pneumonia |

**Supplementary Table 2** Conserved virulence genes in group CAP and HAP.

| VF_Gene_Name | VF_Category |
| --- | --- |
| *alg8* | Biofilm |
| *algA* | Biofilm |
| *algC* | Biofilm |
| *algD* | Biofilm |
| *algE* | Biofilm |
| *algF* | Biofilm |
| *algG* | Biofilm |
| *algI* | Biofilm |
| *algJ* | Biofilm |
| *algK* | Biofilm |
| *algL* | Biofilm |
| *algQ* | Biofilm |
| *algR* | Biofilm |
| *algU* | Biofilm |
| *algW* | Biofilm |
| *algX* | Biofilm |
| *algZ* | Biofilm |
| *aprA* | Exoenzyme |
| *cheY* | Motility |
| *cheZ* | Motility |
| *chpB* | Adherence |
| *chpC* | Adherence |
| *chpD* | Adherence |
| *chpE* | Adherence |
| *clpV1* | Effector delivery system |
| *crc* | Adherence |
| *csrA* | Regulation |
| *dotU1* | Effector delivery system |
| *estA* | Effector delivery system |
| *exsA* | Effector delivery system |
| *exsB* | Effector delivery system |
| *exsC* | Effector delivery system |
| *exsD* | Effector delivery system |
| *exsE* | Effector delivery system |
| *fapA* | Adherence |
| *fapB* | Adherence |
| *fapC* | Adherence |
| *fapD* | Adherence |
| *fapE* | Adherence |
| *fapF* | Adherence |
| *fimL* | Adherence |
| *fimU* | Adherence |
| *fimX* | Adherence |
| *fleI/flaG* | Motility |
| *fleN* | Motility |
| *fleP/fliT* | Motility |
| *fleQ* | Motility |
| *fleR* | Motility |
| *fleS* | Motility |
| *flgA* | Motility |
| *flgB* | Motility |
| *flgC* | Motility |
| *flgD* | Motility |
| *flgE* | Motility |
| *flgF* | Motility |
| *flgG* | Motility |
| *flgI* | Motility |
| *flgJ* | Motility |
| *flgK* | Motility |
| *flgL* | Motility |
| *flgM* | Motility |
| *flgN* | Motility |
| *flhA* | Motility |
| *flhF* | Motility |
| *fliA* | Motility |
| *fliC* | Motility |
| *fliD* | Motility |
| *fliE* | Motility |
| *fliF* | Motility |
| *fliG* | Motility |
| *fliI* | Motility |
| *fliJ* | Motility |
| *fliK* | Motility |
| *fliL* | Motility |
| *fliM* | Motility |
| *fliN* | Motility |
| *fliO* | Motility |
| *fliP* | Motility |
| *fliQ* | Motility |
| *fliS* | Motility |
| *flp* | Adherence |
| *fpvA* | Nutritional/Metabolic factor |
| *fpvI* | Nutritional/Metabolic factor |
| *fpvR* | Nutritional/Metabolic factor |
| *gacA* | Regulation |
| *hcp/tssD* | Effector delivery system |
| *hcp1* | Effector delivery system |
| *hcpA* | Effector delivery system |
| *hdtS* | Biofilm |
| *hsiB1/vipA/tssB* | Effector delivery system |
| *hsiC1/vipB/tssC* | Effector delivery system |
| *hsiE1* | Effector delivery system |
| *hsiF1/tssE* | Effector delivery system |
| *hsiG1/tssF* | Effector delivery system |
| *hsiH1/tssG* | Effector delivery system |
| *hsiJ1* | Effector delivery system |
| *icmF1/tssM1* | Effector delivery system |
| *icmH/tssL* | Effector delivery system |
| *lasA* | Effector delivery system |
| *lasB* | Effector delivery system |
| *lip1* | Effector delivery system |
| *mbtH-like* | Nutritional/Metabolic factor |
| *motA* | Motility |
| *motB* | Motility |
| *motC* | Motility |
| *motD* | Motility |
| *motY* | Motility |
| *mucA* | Biofilm |
| *mucB* | Biofilm |
| *mucC* | Biofilm |
| *mucD* | Biofilm |
| *mucE* | Biofilm |
| *mucP* | Biofilm |
| *PA0677* | Effector delivery system |
| *PA0678* | Effector delivery system |
| *PA0679* | Effector delivery system |
| *PA0680* | Effector delivery system |
| *PA0681* | Effector delivery system |
| *PA0682* | Effector delivery system |
| *PA0684* | Effector delivery system |
| *PA0685* | Effector delivery system |
| *PA0686* | Effector delivery system |
| *PA1459* | Motility |
| *PA1464* | Motility |
| *PA1663* | Effector delivery system |
| *PA1664* | Effector delivery system |
| *PA1665* | Effector delivery system |
| *PA2359* | Effector delivery system |
| *PA2364* | Effector delivery system |
| *PA2383* | Nutritional/Metabolic factor |
| *PA2384* | Nutritional/Metabolic factor |
| *PA2760* | Adherence |
| *PA3348* | Motility |
| *PA3349* | Motility |
| *PA4218* | Nutritional/Metabolic factor |
| *PA4220* | Nutritional/Metabolic factor |
| *PA4294* | Adherence |
| *PA4298* | Adherence |
| *PA4648* | Biofilm |
| *PA4649* | Biofilm |
| *PA4650* | Biofilm |
| *PA4651* | Biofilm |
| *PA4652* | Biofilm |
| *PA4653* | Biofilm |
| *PA4705* | Nutritional/Metabolic factor |
| *PA4706* | Nutritional/Metabolic factor |
| *PA4707* | Nutritional/Metabolic factor |
| *PA4709* | Nutritional/Metabolic factor |
| *pchB* | Nutritional/Metabolic factor |
| *pchC* | Nutritional/Metabolic factor |
| *pchD* | Nutritional/Metabolic factor |
| *pchG* | Nutritional/Metabolic factor |
| *pchH* | Nutritional/Metabolic factor |
| *pchI* | Nutritional/Metabolic factor |
| *pchR* | Nutritional/Metabolic factor |
| *pcr1* | Effector delivery system |
| *pcr2* | Effector delivery system |
| *pcr3* | Effector delivery system |
| *pcr4* | Effector delivery system |
| *pcrD* | Effector delivery system |
| *pcrG* | Effector delivery system |
| *pcrH* | Effector delivery system |
| *pcrR* | Effector delivery system |
| *pcrV* | Effector delivery system |
| *phuR* | Nutritional/Metabolic factor |
| *phuT* | Nutritional/Metabolic factor |
| *phzA1* | Nutritional/Metabolic factor |
| *phzD1* | Nutritional/Metabolic factor |
| *phzE1* | Nutritional/Metabolic factor |
| *phzF1* | Nutritional/Metabolic factor |
| *phzM* | Nutritional/Metabolic factor |
| *phzS* | Nutritional/Metabolic factor |
| *pilB* | Adherence |
| *pilC* | Adherence |
| *pilE* | Adherence |
| *pilF* | Adherence |
| *pilG* | Adherence |
| *pilH* | Adherence |
| *pilK* | Adherence |
| *pilN* | Adherence |
| *pilO* | Adherence |
| *pilS* | Adherence |
| *pilT* | Adherence |
| *pilU* | Adherence |
| *pilW* | Adherence |
| *pilX* | Adherence |
| *pilY1* | Adherence |
| *plcB* | Exotoxin |
| *plcH* | Exotoxin |
| *plcN* | Exotoxin |
| *popB* | Effector delivery system |
| *popD* | Effector delivery system |
| *popN* | Effector delivery system |
| *ppkA* | Effector delivery system |
| *pppA* | Effector delivery system |
| *pprA* | Adherence |
| *prpL* | Exoenzyme |
| *pscB* | Effector delivery system |
| *pscC* | Effector delivery system |
| *pscD* | Effector delivery system |
| *pscE* | Effector delivery system |
| *pscF* | Effector delivery system |
| *pscG* | Effector delivery system |
| *pscH* | Effector delivery system |
| *pscI* | Effector delivery system |
| *pscJ* | Effector delivery system |
| *pscK* | Effector delivery system |
| *pscL* | Effector delivery system |
| *pscN* | Effector delivery system |
| *pscO* | Effector delivery system |
| *pscP* | Effector delivery system |
| *pscQ* | Effector delivery system |
| *pscR* | Effector delivery system |
| *pscS* | Effector delivery system |
| *pscT* | Effector delivery system |
| *pscU* | Effector delivery system |
| *ptxR* | Nutritional/Metabolic factor |
| *pvcA* | Nutritional/Metabolic factor |
| *pvcB* | Nutritional/Metabolic factor |
| *pvcC* | Nutritional/Metabolic factor |
| *pvcD* | Nutritional/Metabolic factor |
| *pvdA* | Nutritional/Metabolic factor |
| *pvdE* | Nutritional/Metabolic factor |
| *pvdF* | Nutritional/Metabolic factor |
| *pvdH* | Nutritional/Metabolic factor |
| *pvdM* | Nutritional/Metabolic factor |
| *pvdN* | Nutritional/Metabolic factor |
| *pvdO* | Nutritional/Metabolic factor |
| *pvdP* | Nutritional/Metabolic factor |
| *pvdQ* | Nutritional/Metabolic factor |
| *rcpA* | Adherence |
| *rcpC* | Adherence |
| *rhlC* | Immune modulation |
| *rpoN* | Adherence |
| *rpoS* | Adherence |
| *spcS* | Effector delivery system |
| *stk1* | Effector delivery system |
| *stp1* | Effector delivery system |
| *tadA* | Adherence |
| *tadB* | Adherence |
| *tadC* | Adherence |
| *tadD* | Adherence |
| *tadG* | Adherence |
| *tadZ* | Adherence |
| *tagF/pppB* | Effector delivery system |
| *tagQ* | Effector delivery system |
| *tagR* | Effector delivery system |
| *tagS* | Effector delivery system |
| *tagT* | Effector delivery system |
| *tse1* | Effector delivery system |
| *tse3* | Effector delivery system |
| *tse5/rhsP1* | Effector delivery system |
| *tse6* | Effector delivery system |
| *tssA* | Effector delivery system |
| *tssB* | Effector delivery system |
| *tssC* | Effector delivery system |
| *tssE* | Effector delivery system |
| *tssF* | Effector delivery system |
| *tssG* | Effector delivery system |
| *tssH* | Effector delivery system |
| *tssI* | Effector delivery system |
| *tssJ* | Effector delivery system |
| *tssK* | Effector delivery system |
| *tssM* | Effector delivery system |
| *tufA* | Adherence |
| *vfr* | Adherence |
| *vgrG1a* | Effector delivery system |
| *vgrG1b* | Effector delivery system |
| *waaA* | Immune modulation |
| *waaC* | Immune modulation |
| *waaF* | Immune modulation |
| *waaG* | Immune modulation |
| *waaP* | Immune modulation |
| *xcpA/pilD* | Adherence |
| *xcpP* | Effector delivery system |
| *xcpQ* | Effector delivery system |
| *xcpR* | Effector delivery system |
| *xcpS* | Effector delivery system |
| *xcpT* | Effector delivery system |
| *xcpU* | Effector delivery system |
| *xcpV* | Effector delivery system |
| *xcpW*  *xcpX* | Effector delivery system |
| Effector delivery system  Effector delivery system |
| *xcpY* |
| *xcpZ* | Effector delivery system |

**Supplementary Table 3** Virulence genes absent in CAP isolates but present in HAP genomes.

| *Gene* | VF Category |
| --- | --- |
| *asnB* | Immune modulation |
| *hisF* | Immune modulation |
| *hisH2* | Immune modulation |
| *neuC* | Immune modulation |
| *PA14 RS09475* | Immune modulation |
| *PA14 RS09480* | Immune modulation |
| *PA14 RS09485* | Immune modulation |
| *PA14 RS09490* | Immune modulation |
| *PA14 RS09495* | Immune modulation |
| *PA14 RS09500* | Immune modulation |
| *PA14 RS29910* | Immune modulation |
| *PA14 RS29915* | Immune modulation |
| *PA14 RS29920* | Immune modulation |
| *PLES RS09885* | Immune modulation |
| *PLES RS09905* | Immune modulation |
| *PLES RS09910* | Immune modulation |
| *PLES RS09920* | Immune modulation |
| *PLES RS09925* | Immune modulation |
| *PLES RS09930* | Immune modulation |
| *PLES RS09935* | Immune modulation |
| *PLES RS09940* | Immune modulation |
| *pseB* | Immune modulation |
| *PSPA7 RS09425* | Immune modulation |
| *PSPA7 RS09460* | Immune modulation |
| *PSPA7 RS30415* | Immune modulation |
| *PSPA7 RS30430* | Immune modulation |
| *PSPA7 RS30875* | Immune modulation |
| *PSPA7 RS30880* | Immune modulation |
| *PSPA7 RS31970* | Immune modulation |
| *PSPA7 RS31975* | Immune modulation |
| *tviB* | Immune modulation |
| *tviC* | Immune modulation |
| *wecC* | Immune modulation |
| *PA14 RS24355* | Biofilm |
| *PA14 RS24360* | Biofilm |
| *PA14 RS24370* | Biofilm |
| *PA14 RS24375* | Biofilm |
| *pldA/tle5a* | Effector delivery system |
| *rhsP2* | Effector delivery system |
| *spcU* | Effector delivery system |

**Supplementary Table 4** CAP-specific genes and annotations.

| Orthogroup | type | sample | geneID | NR_Annotation | Gene_Name | COG_Category | COG_Description |
| --- | --- | --- | --- | --- | --- | --- | --- |
| OG0009474 | Orthologues | PARM_L1 | PARM_L1_gene_0650 | secretion SecE domain protein | - | -- | -- |
| OG0009475 | Orthologues | PARM_L1 | PARM_L1_gene_1042 | hypothetical protein | - | -- | -- |
| OG0009476 | Orthologues | PARM_L1 | PARM_L1_gene_2071 | hypothetical protein | - | -- | -- |
| OG0009479 | Orthologues | PARM_L1 | PARM_L1_gene_5167 | hypothetical protein | - | -- | -- |
| OG0010223 | Orthologues | PARM_L1 | PARM_L1_gene_4202 | hypothetical protein | - | -- | -- |
| OG0010224 | Orthologues | PARM_L1 | PARM_L1_gene_3142 | alpha/beta hydrolase | -- | S | Dienelactone hydrolase family |
| OG0010224 | Orthologues | PARM_L1 | PARM_L1_gene_3141 | alpha/beta hydrolase | -- | S | BAAT / Acyl-CoA thioester hydrolase C terminal |
| OG0011629 | unassigned | PARM_L1 | PARM_L1_gene_1122 | hypothetical protein | - | -- | -- |
| OG0011630 | unassigned | PARM_L1 | PARM_L1_gene_1213 | hypothetical protein | - | -- | -- |
| OG0011631 | unassigned | PARM_L1 | PARM_L1_gene_1217 | hypothetical protein | - | -- | -- |
| OG0011632 | unassigned | PARM_L1 | PARM_L1_gene_1375 | DUF4765 family protein | - | -- | -- |
| OG0011633 | unassigned | PARM_L1 | PARM_L1_gene_1418 | Uncharacterised protein | - | -- | -- |
| OG0011634 | unassigned | PARM_L1 | PARM_L1_gene_1851 | hypothetical protein | - | -- | -- |
| OG0011635 | unassigned | PARM_L1 | PARM_L1_gene_1852 | hypothetical protein | - | -- | -- |
| OG0011636 | unassigned | PARM_L1 | PARM_L1_gene_1889 | hypothetical protein | asd | -- | -- |
| OG0011637 | unassigned | PARM_L1 | PARM_L1_gene_2063 | hypothetical protein | - | -- | -- |
| OG0011638 | unassigned | PARM_L1 | PARM_L1_gene_2295 | hypothetical protein | - | -- | -- |
| OG0011639 | unassigned | PARM_L1 | PARM_L1_gene_2473 | hypothetical protein | - | -- | -- |
| OG0011640 | unassigned | PARM_L1 | PARM_L1_gene_2480 | hypothetical protein | - | -- | -- |
| OG0011641 | unassigned | PARM_L1 | PARM_L1_gene_2678 | hypothetical protein | - | -- | -- |
| OG0011642 | unassigned | PARM_L1 | PARM_L1_gene_2766 | hypothetical protein | - | -- | -- |
| OG0011643 | unassigned | PARM_L1 | PARM_L1_gene_2866 | 4-oxalocrotonate tautomerase | praC | S | 4-oxalocrotonate tautomerase |
| OG0011644 | unassigned | PARM_L1 | PARM_L1_gene_3139 | hypothetical protein | - | C | Flavodoxin |
| OG0011645 | unassigned | PARM_L1 | PARM_L1_gene_3191 | hypothetical protein | - | -- | -- |
| OG0011646 | unassigned | PARM_L1 | PARM_L1_gene_3453 | hypothetical protein | kdpD | -- | -- |
| OG0011647 | unassigned | PARM_L1 | PARM_L1_gene_3666 | alginate export family protein | - | -- | -- |
| OG0011648 | unassigned | PARM_L1 | PARM_L1_gene_3674 | hydroquinone dioxygenase large subunit | - | -- | -- |
| OG0011649 | unassigned | PARM_L1 | PARM_L1_gene_3675 | hypothetical protein | - | -- | -- |
| OG0011650 | unassigned | PARM_L1 | PARM_L1_gene_3734 | ATP-binding protein | - | LO | Belongs to the peptidase S16 family |
| OG0011651 | unassigned | PARM_L1 | PARM_L1_gene_3735 | hypothetical protein | - | -- | -- |
| OG0011652 | unassigned | PARM_L1 | PARM_L1_gene_3908 | hypothetical protein | - | -- | -- |
| OG0011653 | unassigned | PARM_L1 | PARM_L1_gene_4134 | hypothetical protein | - | -- | -- |
| OG0011654 | unassigned | PARM_L1 | PARM_L1_gene_4185 | hypothetical protein | - | -- | -- |
| OG0011655 | unassigned | PARM_L1 | PARM_L1_gene_4226 | hypothetical protein | - | -- | -- |
| OG0011656 | unassigned | PARM_L1 | PARM_L1_gene_4520 | hypothetical protein | - | -- | -- |
| OG0011657 | unassigned | PARM_L1 | PARM_L1_gene_4899 | Uncharacterised protein | - | -- | -- |
| OG0011658 | unassigned | PARM_L1 | PARM_L1_gene_4994 | hypothetical protein | - | -- | -- |
| OG0011659 | unassigned | PARM_L1 | PARM_L1_gene_5219 | urease accessory protein UreG | ureG | -- | -- |
| OG0011660 | unassigned | PARM_L1 | PARM_L1_gene_5468 | imidazole glycerol phosphate synthase cyclase subunit | hisF | -- | -- |
| OG0008542 | Orthologues | PARM_Z1 | PARM_Z1_gene_2825 | hypothetical protein | - | -- | -- |
| OG0008542 | Orthologues | PARM_Z1 | PARM_Z1_gene_2815 | hypothetical protein | - | -- | -- |
| OG0009474 | Orthologues | PARM_Z1 | PARM_Z1_gene_0669 | hypothetical protein | - | -- | -- |
| OG0009475 | Orthologues | PARM_Z1 | PARM_Z1_gene_1060 | hypothetical protein | - | -- | -- |
| OG0009476 | Orthologues | PARM_Z1 | PARM_Z1_gene_2068 | hypothetical protein | - | -- | -- |
| OG0009478 | Orthologues | PARM_Z1 | PARM_Z1_gene_5055 | hypothetical protein | - | -- | -- |
| OG0009478 | Orthologues | PARM_Z1 | PARM_Z1_gene_4514 | hypothetical protein | - | -- | -- |
| OG0009479 | Orthologues | PARM_Z1 | PARM_Z1_gene_5243 | hypothetical protein | - | -- | -- |
| OG0010219 | Orthologues | PARM_Z1 | PARM_Z1_gene_3232 | hypothetical protein | - | -- | -- |
| OG0010222 | Orthologues | PARM_Z1 | PARM_Z1_gene_3804 | hypothetical protein | - | -- | -- |
| OG0011661 | unassigned | PARM_Z1 | PARM_Z1_gene_0141 | Uncharacterised protein | - | -- | -- |
| OG0011662 | unassigned | PARM_Z1 | PARM_Z1_gene_0179 | response regulator | cheB | NT | catalyzes the demethylation of specific methylglutamate residues introduced into the chemoreceptors (methyl-accepting chemotaxis proteins) by CheR |
| OG0011663 | unassigned | PARM_Z1 | PARM_Z1_gene_0504 | LysR family transcriptional regulator | - | -- | -- |
| OG0011664 | unassigned | PARM_Z1 | PARM_Z1_gene_1122 | hypothetical protein | - | -- | -- |
| OG0011665 | unassigned | PARM_Z1 | PARM_Z1_gene_1128 | Uncharacterised protein | - | -- | -- |
| OG0011667 | unassigned | PARM_Z1 | PARM_Z1_gene_1854 | hypothetical protein | - | -- | -- |
| OG0011668 | unassigned | PARM_Z1 | PARM_Z1_gene_2016 | DUF2062 domain-containing protein | -- | -- | -- |
| OG0011669 | unassigned | PARM_Z1 | PARM_Z1_gene_2208 | hypothetical protein | - | -- | -- |
| OG0011670 | unassigned | PARM_Z1 | PARM_Z1_gene_2455 | hypothetical protein | - | -- | -- |
| OG0011671 | unassigned | PARM_Z1 | PARM_Z1_gene_2759 | hypothetical protein | yahK | -- | -- |
| OG0011672 | unassigned | PARM_Z1 | PARM_Z1_gene_3181 | Uncharacterised protein | - | -- | -- |
| OG0011673 | unassigned | PARM_Z1 | PARM_Z1_gene_3590 | siderophore receptor | TC.FEV.OM | -- | -- |
| OG0011674 | unassigned | PARM_Z1 | PARM_Z1_gene_3942 | hypothetical protein | - | -- | -- |
| OG0011675 | unassigned | PARM_Z1 | PARM_Z1_gene_4168 | hypothetical protein | - | -- | -- |
| OG0011676 | unassigned | PARM_Z1 | PARM_Z1_gene_4412 | hypothetical protein | - | -- | -- |
| OG0011677 | unassigned | PARM_Z1 | PARM_Z1_gene_4604 | DUF2334 domain-containing protein | -- | -- | -- |
| OG0011678 | unassigned | PARM_Z1 | PARM_Z1_gene_4855 | hypothetical protein | - | -- | -- |
| OG0011679 | unassigned | PARM_Z1 | PARM_Z1_gene_5042 | hypothetical protein | - | -- | -- |
| OG0011680 | unassigned | PARM_Z1 | PARM_Z1_gene_5044 | hypothetical protein | - | -- | -- |
| OG0011681 | unassigned | PARM_Z1 | PARM_Z1_gene_5045 | Putative molybdenum carrier | - | LU | Putative molybdenum carrier |
| OG0011682 | unassigned | PARM_Z1 | PARM_Z1_gene_5047 | hypothetical protein | - | -- | -- |
| OG0011683 | unassigned | PARM_Z1 | PARM_Z1_gene_5048 | hypothetical protein | - | -- | -- |
| OG0011684 | unassigned | PARM_Z1 | PARM_Z1_gene_5177 | two-component system response regulator | -- | -- | -- |
| OG0008542 | Orthologues | PARM801 | PARM801_gene_3166 | hypothetical protein | - | -- | -- |
| OG0008542 | Orthologues | PARM801 | PARM801_gene_3175 | hypothetical protein | - | -- | -- |
| OG0009474 | Orthologues | PARM801 | PARM801_gene_0670 | secretion SecE domain protein | - | -- | -- |
| OG0009475 | Orthologues | PARM801 | PARM801_gene_1147 | hypothetical protein | - | -- | -- |
| OG0009476 | Orthologues | PARM801 | PARM801_gene_2096 | hypothetical protein | - | -- | -- |
| OG0009477 | Orthologues | PARM801 | PARM801_gene_2305 | enoyl-CoA hydratase | paaF | I | Belongs to the enoyl-CoA hydratase isomerase family |
| OG0009477 | Orthologues | PARM801 | PARM801_gene_3718 | enoyl-CoA hydratase | paaF | I | Belongs to the enoyl-CoA hydratase isomerase family |
| OG0009477 | Orthologues | PARM801 | PARM801_gene_3693 | enoyl-CoA hydratase/isomerase family protein | paaF | I | Enoyl-CoA hydratase/isomerase |
| OG0009478 | Orthologues | PARM801 | PARM801_gene_5056 | hypothetical protein | - | -- | -- |
| OG0009479 | Orthologues | PARM801 | PARM801_gene_5830 | hypothetical protein | - | -- | -- |
| OG0010214 | Orthologues | PARM801 | PARM801_gene_2287 | outer membrane protein transport protein | fadL | I | Membrane protein involved in aromatic hydrocarbon degradation |
| OG0010214 | Orthologues | PARM801 | PARM801_gene_2350 | outer membrane protein transport protein | fadL | I | Membrane protein involved in aromatic hydrocarbon degradation |
| OG0010215 | Orthologues | PARM801 | PARM801_gene_2352 | RecName: Full=Toluene-4-monooxygenase system, ferredoxin component; Short=T4MO; AltName: Full=Toluene-4-monooxygenase system protein C; Short=T4moC | - | P | Rieske-like [2Fe-2S] domain |
| OG0010215 | Orthologues | PARM801 | PARM801_gene_2294 | non-heme iron oxygenase ferredoxin subunit | cmtAd | P | Rieske [2Fe-2S] domain |
| OG0010216 | Orthologues | PARM801 | PARM801_gene_2303 | enoyl-CoA hydratase/isomerase family protein | - | I | Enoyl-CoA hydratase |
| OG0010216 | Orthologues | PARM801 | PARM801_gene_3720 | enoyl-CoA hydratase/isomerase family protein | - | I | Enoyl-CoA hydratase |
| OG0010217 | Orthologues | PARM801 | PARM801_gene_2304 | 3-hydroxyisobutyrate dehydrogenase | HIBADH | I | NAD-binding of NADP-dependent 3-hydroxyisobutyrate dehydrogenase |
| OG0010217 | Orthologues | PARM801 | PARM801_gene_3719 | 3-hydroxyisobutyrate dehydrogenase | HIBADH | I | Belongs to the 3-hydroxyisobutyrate dehydrogenase family |
| OG0010218 | Orthologues | PARM801 | PARM801_gene_2306 | CoA-acylating methylmalonate-semialdehyde dehydrogenase | mmsA | C | methylmalonate-semialdehyde dehydrogenase |
| OG0010218 | Orthologues | PARM801 | PARM801_gene_3717 | CoA-acylating methylmalonate-semialdehyde dehydrogenase | mmsA | C | Methylmalonate-semialdehyde dehydrogenase |
| OG0010219 | Orthologues | PARM801 | PARM801_gene_3611 | hypothetical protein | - | -- | -- |
| OG0010220 | Orthologues | PARM801 | PARM801_gene_3688 | AraC family transcriptional regulator | - | K | transcriptional regulator, AraC |
| OG0010220 | Orthologues | PARM801 | PARM801_gene_3700 | AraC family transcriptional regulator | - | -- | -- |
| OG0010221 | Orthologues | PARM801 | PARM801_gene_3694 | SDR family oxidoreductase | - | IQ | Short-chain dehydrogenase reductase sdr |
| OG0010221 | Orthologues | PARM801 | PARM801_gene_3699 | 3-hydroxyacyl-CoA dehydrogenase | - | IQ | Belongs to the short-chain dehydrogenases reductases (SDR) family |
| OG0010222 | Orthologues | PARM801 | PARM801_gene_4274 | hypothetical protein | - | -- | -- |
| OG0010223 | Orthologues | PARM801 | PARM801_gene_5454 | hypothetical protein | - | -- | -- |
| OG0011571 | unassigned | PARM801 | PARM801_gene_0134 | transcriptional regulator | - | -- | -- |
| OG0011572 | unassigned | PARM801 | PARM801_gene_0813 | putative membrane protein | - | -- | -- |
| OG0011573 | unassigned | PARM801 | PARM801_gene_0841 | hypothetical protein | - | -- | -- |
| OG0011574 | unassigned | PARM801 | PARM801_gene_1885 | hypothetical protein | - | -- | -- |
| OG0011575 | unassigned | PARM801 | PARM801_gene_1963 | hypothetical protein | - | -- | -- |
| OG0011576 | unassigned | PARM801 | PARM801_gene_2053 | hypothetical protein | - | -- | -- |
| OG0011577 | unassigned | PARM801 | PARM801_gene_2256 | helix-turn-helix transcriptional regulator | - | K | sequence-specific DNA binding |
| OG0011578 | unassigned | PARM801 | PARM801_gene_2277 | lipocalin-like domain-containing protein | - | G | Lipocalin-like domain |
| OG0011579 | unassigned | PARM801 | PARM801_gene_2279 | hypothetical protein | - | -- | -- |
| OG0011580 | unassigned | PARM801 | PARM801_gene_2280 | hypothetical protein | - | -- | -- |
| OG0011581 | unassigned | PARM801 | PARM801_gene_2285 | hypothetical protein | - | -- | -- |
| OG0011582 | unassigned | PARM801 | PARM801_gene_2307 | entry exclusion lipoprotein TrbK | - | -- | -- |
| OG0011583 | unassigned | PARM801 | PARM801_gene_2327 | c-type cytochrome | CYC | C | Cytochrome c |
| OG0011584 | unassigned | PARM801 | PARM801_gene_2329 | hypothetical protein | - | -- | -- |
| OG0011585 | unassigned | PARM801 | PARM801_gene_2333 | transporter | - | -- | -- |
| OG0011586 | unassigned | PARM801 | PARM801_gene_2346 | amidohydrolase family protein | ligI | S | Amidohydrolase |
| OG0011587 | unassigned | PARM801 | PARM801_gene_2347 | protocatechuate 4,5-dioxygenase subunit alpha | ligA | S | Aromatic-ring-opening dioxygenase LigAB, LigA subunit |
| OG0011588 | unassigned | PARM801 | PARM801_gene_2351 | RecName: Full=Toluene-4-monooxygenase system, hydroxylase component subunit alpha; Short=T4MO; AltName: Full=Toluene-4-monooxygenase hydroxylase subunit; Short=T4moH; AltName: Full=Toluene-4-monooxygenase system protein A; Short=T4moA | tmoA | V | Methane/Phenol/Toluene Hydroxylase |
| OG0011589 | unassigned | PARM801 | PARM801_gene_2353 | RecName: Full=Toluene-4-monooxygenase system, effector component; Short=T4MO; AltName: Full=Toluene-4-monooxygenase effector protein; AltName: Full=Toluene-4-monooxygenase system protein D; Short=T4moD | tmoD | S | MmoB/DmpM family |
| OG0011590 | unassigned | PARM801 | PARM801_gene_2354 | RecName: Full=Toluene-4-monooxygenase system, hydroxylase component subunit beta; Short=T4MO; AltName: Full=Toluene-4-monooxygenase hydroxylase subunit; Short=T4moH; AltName: Full=Toluene-4-monooxygenase system protein E; Short=T4moE | tmoE | -- | -- |
| OG0011591 | unassigned | PARM801 | PARM801_gene_2355 | hypothetical protein | - | -- | -- |
| OG0011592 | unassigned | PARM801 | PARM801_gene_2372 | DUF3883 domain-containing protein | - | V | Domain of unknown function (DUF3883) |
| OG0011593 | unassigned | PARM801 | PARM801_gene_2374 | recombinase family protein | - | L | Recombinase |
| OG0011594 | unassigned | PARM801 | PARM801_gene_2375 | ParB N-terminal domain-containing protein | parB | K | Belongs to the ParB family |
| OG0011595 | unassigned | PARM801 | PARM801_gene_2467 | hypothetical protein | - | -- | -- |
| OG0011596 | unassigned | PARM801 | PARM801_gene_2472 | hypothetical protein | - | -- | -- |
| OG0011597 | unassigned | PARM801 | PARM801_gene_2615 | DUF4433 domain-containing protein | - | -- | -- |
| OG0011598 | unassigned | PARM801 | PARM801_gene_2616 | hypothetical protein | - | V | site-specific DNA-methyltransferase (adenine-specific) activity |
| OG0011599 | unassigned | PARM801 | PARM801_gene_2617 | hypothetical protein | - | -- | -- |
| OG0011600 | unassigned | PARM801 | PARM801_gene_2624 | AAA family ATPase | - | -- | -- |
| OG0011601 | unassigned | PARM801 | PARM801_gene_2626 | hypothetical protein | - | -- | -- |
| OG0011602 | unassigned | PARM801 | PARM801_gene_2837 | hypothetical protein | - | -- | -- |
| OG0011603 | unassigned | PARM801 | PARM801_gene_3289 | hypothetical protein | - | -- | -- |
| OG0011604 | unassigned | PARM801 | PARM801_gene_3687 | hypothetical protein | - | -- | -- |
| OG0011605 | unassigned | PARM801 | PARM801_gene_3696 | hypothetical protein | - | -- | -- |
| OG0011606 | unassigned | PARM801 | PARM801_gene_3704 | DUF4242 domain-containing protein | - | -- | -- |
| OG0011607 | unassigned | PARM801 | PARM801_gene_3745 | hypothetical protein | - | -- | -- |
| OG0011608 | unassigned | PARM801 | PARM801_gene_3814 | hypothetical protein | - | -- | -- |
| OG0011609 | unassigned | PARM801 | PARM801_gene_3822 | hypothetical protein | - | -- | -- |
| OG0011610 | unassigned | PARM801 | PARM801_gene_3828 | hypothetical protein | - | -- | -- |
| OG0011611 | unassigned | PARM801 | PARM801_gene_3830 | hypothetical protein | - | -- | -- |
| OG0011612 | unassigned | PARM801 | PARM801_gene_4116 | hypothetical protein | - | -- | -- |
| OG0011613 | unassigned | PARM801 | PARM801_gene_4121 | hypothetical protein | - | -- | -- |
| OG0011614 | unassigned | PARM801 | PARM801_gene_4691 | hypothetical protein | - | -- | -- |
| OG0011615 | unassigned | PARM801 | PARM801_gene_4693 | hypothetical protein | - | -- | -- |
| OG0011616 | unassigned | PARM801 | PARM801_gene_4730 | permease | -- | S | Predicted permease |
| OG0011617 | unassigned | PARM801 | PARM801_gene_4745 | MFS transporter | - | EGP | Major facilitator superfamily |
| OG0011618 | unassigned | PARM801 | PARM801_gene_4746 | glycoside hydrolase family 65 protein | mapA | G | Glycosyl hydrolase family 65 central catalytic domain |
| OG0011619 | unassigned | PARM801 | PARM801_gene_4748 | hypothetical protein | - | -- | -- |
| OG0011620 | unassigned | PARM801 | PARM801_gene_4749 | hypothetical protein | - | -- | -- |
| OG0011621 | unassigned | PARM801 | PARM801_gene_4759 | cytolethal distending toxin subunit B family protein | - | -- | -- |
| OG0011622 | unassigned | PARM801 | PARM801_gene_4761 | hypothetical protein | - | -- | -- |
| OG0011623 | unassigned | PARM801 | PARM801_gene_4789 | hypothetical protein | - | -- | -- |
| OG0011624 | unassigned | PARM801 | PARM801_gene_5066 | hypothetical protein | - | -- | -- |
| OG0011625 | unassigned | PARM801 | PARM801_gene_5070 | hypothetical protein | - | -- | -- |
| OG0011626 | unassigned | PARM801 | PARM801_gene_5502 | nucleotidyltransferase | - | -- | -- |
| OG0011627 | unassigned | PARM801 | PARM801_gene_5503 | hypothetical protein | - | -- | -- |
| OG0011628 | unassigned | PARM801 | PARM801_gene_5656 | ATP-binding protein | - | -- | -- |
